# Supplementary material for: Climate on the Blanca Massif, Sangre de Cristo Mountains, Colorado, USA, during the Last Glacial Maximum
Source: MDPI journal article supplement (doi:10.3390/quat4030027), 2021-08-30
Supplement: s1 [file s1]

## Article

# Climate on the Blanca Massif, Sangre de Cristo Mountains, Colorado, USA, during the Last Glacial Maximum

Keith A. Brugger <sup>1,\*</sup>, Eric M. Leonard <sup>2</sup>, Kurt A. Refsnider <sup>3</sup> and Peter Dolan <sup>4</sup>

<sup>1</sup> Geology Discipline, University of Minnesota, Morris, MN 56267, USA;

<sup>2</sup> Department of Geology, Colorado College, Colorado Springs, CO 80903, USA; eleonard@coloradocollege.edu

<sup>3</sup> 101 W Goodwin St #3849, Prescott, AZ 86302, USA; kurt.refsnider@gmail.com

<sup>4</sup> Statistics and Computer Science Disciplines, University of Minnesota, Morris, MN 56267, USA; dolan118@morris.umn.edu

\* Correspondence: bruggeka@morris.umn.edu

## Supplementary Material for Review

### Compilation and analysis of melt factors

Melt (or degree-day) factors for snow and ice are required for temperature-index modeling of ablation. Values used in the accompanying paper are based on correlations between point measurements of melt and positive degree-days, or through calibration using net surface ablation available in the literature as listed in Table S1. Care was taken in the selection of values, where possible, so as to avoid values: (1) derived from ablation measurements made in “extreme” environments, specifically in Antarctica, tropical settings, and at extremely high elevations (> 4500 m); (2) used in enhanced temperature-index models where solar radiation is taken into account; (3) derived via tuning to reproduce *regional* basin-wide melt and/or runoff; (4) derived using a melt threshold significantly different than 0 or 1 °C; (5) where it is unclear whether ablation of ice or snow was measured; and/or (6) measured on debris-rich surfaces. Finally, in studies where melt factors were determined at several locations on an individual glacier, or several (nearby) glaciers over the same general time interval (if given), a single mean value is listed with its standard deviation.

**Table S1.** Compilation of melt (degree-) day factors (mm °C<sup>-1</sup> d<sup>-1</sup>) arranged from lowest to largest values. Note that a glacier and corresponding reference will occur more than once if values were obtained at substantially different times. Original source is given where values were cited in another work. Standard deviations are provided if given in source, or when multiple values were averaged.

| Ice, ice and snow                      |                                     |           | Original source<br>(where applica-<br>ble) | Refer-<br>ence | Comments                    |
|----------------------------------------|-------------------------------------|-----------|--------------------------------------------|----------------|-----------------------------|
| Location                               | Melt factors and standard deviation |           |                                            |                |                             |
|                                        | Ice                                 | Snow      |                                            |                |                             |
| Batura Glacier, Karakoram              | 3.4                                 |           |                                            | [1]            | Reported means              |
| Bench Glacier, Coast Range, Canada     | 4.2                                 | 2.8       |                                            | [2]            |                             |
| Bridge Glacier, Coast Range, Canada    | 4.2                                 | 3.2       |                                            | [2]            |                             |
| Sykora Glacier, Coast Range, Canada    | 4.2                                 | 3.3       |                                            | [2]            |                             |
| Lemon Glacier, Alaska                  | 4.5                                 | 3.6       |                                            | [3]            |                             |
| Woolsey Glacier, Canadian Rockies      | 4.6                                 | 3.2       |                                            | [2]            |                             |
| Place Glacier, Coast Range, Canada     | 4.7                                 | 2.7       |                                            | [2]            |                             |
| Tiedemann Glacier, Coast Range, Canada | 4.8                                 | 3         |                                            | [2]            |                             |
| Blöndujökull, Kvíslajökull, Iceland    | 5                                   | 4.5       |                                            | [4]            | Mean, 4 values<br>ice, snow |
| Hailuogou Glacier, Hengduan Mountains  | 5                                   |           |                                            | [1]            |                             |
| Glacier de Saint-Sorlin, Glacier de    | 5 ± 0.4                             | 4.2 ± 0.5 |                                            | [5]            |                             |
| Gébroulaz, Glacier de Argentiére, Mer  |                                     |           |                                            |                |                             |

|                                                                                                 |           |           |                           |      |                          |
|-------------------------------------------------------------------------------------------------|-----------|-----------|---------------------------|------|--------------------------|
| de Glace, French Alps                                                                           |           |           |                           |      |                          |
| Rembeddalsskåka, Norway                                                                         | 5.2       | 3.4       |                           | [6]  |                          |
| Helm Glacier, Coast Range, Canada                                                               | 5.3       | 3.6       |                           | [2]  |                          |
| Storbreen, Norway                                                                               | 5.3       | 4         |                           | [6]  |                          |
| Engabreen, Norway                                                                               | 5.4       | 3.4       |                           | [6]  |                          |
| Storbreen, Norway                                                                               | 5.5       |           | Liestøl, 1967             | [7]  |                          |
| Nigardsbreen, Norway                                                                            | 5.5       | 4         | Laumann and Reeh, 1993    | [7]  |                          |
| Hellstugubreen, Norway                                                                          | 5.5       | 3.5       | Laumann and Reeh, 1993    | [7]  |                          |
| John Evans Glacier, Canada                                                                      | 5.5       | 3.3 ± 0.8 | Arendt and Sharp, 1999    | [8]  | Mean, 2 values, snow     |
| Taku Glacier, Alaska                                                                            | 5.5       | 2.3       |                           | [3]  |                          |
| Various Norwegian glaciers                                                                      | 5.5       |           | Braithwaite, 1977         | [7]  |                          |
| White Glacier, Arctic Canada                                                                    | 6.4       |           |                           | [9]  |                          |
| Peyro Glacier, Canadian Rockies                                                                 | 5.6       | 2.3       |                           | [2]  |                          |
| Ålfobreen, Norway                                                                               | 5.6       | 4.1       |                           | [6]  |                          |
| Mendenhall Glacier, Alaska                                                                      | 5.7       | 4.6       |                           | [10] |                          |
| Keqicar Baqi Glacier, Tien Shan                                                                 | 5.8 ± 1.8 |           |                           | [1]  | Mean, 2 values           |
| White Glacier, Arctic Canada                                                                    | 5.8       |           |                           | [9]  |                          |
| Han Tausen Land, North Greenland                                                                | 5.9       |           | Braithwaite et al., 1998  | [7]  |                          |
| Storglaciären, Sweden                                                                           | 5.9 ± 0.7 |           | Hock, 1999                | [8]  | Mean, 2 values, ice      |
| Franz Josef Glacier, New Zealand                                                                | 6         | 3         | Woo and Fitzharris, 1992  | [7]  |                          |
| Ålfotbreen, Norway                                                                              | 6         | 4.5       | Laumann and Reeh, 1993    | [7]  |                          |
| Storglaciären, Sweden                                                                           | 6         | 3.2       | Hock, 1999                | [8]  |                          |
| Various Swiss glaciers                                                                          | 6         |           | Kasser, 1959              | [7]  | Reported mean value      |
| Sverdrup Glacier, Arctic Canada                                                                 | 6         |           |                           | [9]  |                          |
| Glacier de Saint-Sorlin, Glacier de Gébroulaz, Glacier de Argentiére, Mer de Glace, French Alps | 6.1       | 3         |                           | [11] | Reported means           |
| Glacier de Saint-Sorlin, French Alps                                                            | 6.1       |           |                           | [12] |                          |
| Glacier de Sarnes, French Alps                                                                  | 6.2       | 3.8       | Vincent and Val-lon, 1997 | [7]  |                          |
| South Cascade Glacier, United States                                                            | 6.2       |           |                           | [13] |                          |
| Supphellebreen, Norway                                                                          | 6.3       |           | Orheim, 1970              | [7]  |                          |
| Glaciers 29-31, Northeast Siberia                                                               | 6.3       | 2.6       |                           | [14] | Mean of listed range     |
| Nigardsbreen, Norway                                                                            | 6.3       | 4.7       |                           | [6]  |                          |
| Nigardsbreen, Norway                                                                            | 6.4       | 4.4       | Jóhannesson et al., 1995  | [7]  |                          |
| Glacier de Saint-Sorlin, French Alps                                                            | 6.4       | 4         |                           | [15] |                          |
| Rhonegletscher, Swiss Alps                                                                      | 6.6 ± 0.6 | 5.2 ± 0.8 |                           | [16] | Mean, 5 values ice, snow |
| Lirung Glacier                                                                                  | 6.6       |           |                           | [17] | Debris-free ice          |
| Rakiot Glacier, Himalaya                                                                        | 6.6       |           |                           | [17] | Debris-free ice          |
| Rabots Glaciär, Sweden                                                                          | 6.8       | 4.7       |                           | [18] |                          |
| Qiongtailan Glacier, Tien Shan                                                                  | 6.8 ± 2.1 | 3.4       |                           | [1]  | Mean, 3 values ice       |
| Glacier de la Plaine Morte, Swiss Alps                                                          | 6.8 ± 0.9 |           |                           | [19] |                          |
| Moreno Glacier, Patagonia                                                                       | 7         |           | Takeuchi et al., 1996     | [7]  | Mean of given range      |
| Koryto Glacier, Kamchaka                                                                        | 7         | 4.7       |                           | [20] |                          |
| Glaciar Perito Moreno, Patagonia                                                                | 7 ± 0.8   |           |                           | [21] | Mean, 5 values           |
| Glacier de Sarnes, French Alps                                                                  | 7 ± 0.2   | 4.1       |                           | [22] | Mean, 2 values ice       |

|                                           |                |                |                          |      |                            |
|-------------------------------------------|----------------|----------------|--------------------------|------|----------------------------|
| Glacier Upsala, Patagonia                 | 7.1            |                |                          | [23] |                            |
| Glaciar Perito Moreno, Patagonia          | 7.1            |                |                          | [23] |                            |
| Storglaciaren, Sweden                     | $7.1 \pm 0.1$  | $7.2 \pm 0.6$  |                          | [24] | Mean, 2 values             |
| Franz Josef Glacier, New Zealand          | $7.2 \pm 0.2$  | $4.6 \pm 0.5$  |                          | [25] |                            |
| Qamanârssûp sermia, West Greenland        | 7.3            | 2.8            | Jóhannesson et al., 1995 | [7]  |                            |
| Ürümqi No. 1 Glacier, Tien Shan           | 7.3            |                | Lui et al., 1996         | [1]  |                            |
| Hofsjökull, Iceland                       | 7.3            | 5.3            |                          | [26] |                            |
| Dokriani Glacier, Himalaya                | 7.4            | 5.7            | Singh et al., 2000       | [8]  |                            |
| Ålfotbreen, Norway                        | 7.5            |                | NVE, 1965                | [4]  |                            |
| Storsteinsfjellbreen, Norway              | 7.5            |                |                          | [27] |                            |
| Illviðarájökull, Iceland                  | 7.6            | 5.6            |                          | [4]  |                            |
| Gran Campo Nevado Ice Cap, Patagonia      | 7.6            |                |                          | [28] |                            |
| Sátujökull, Iceland                       | 7.7            | 5.6            | Jóhannesson et al., 1995 | [7]  |                            |
| Qamanârssûp sermia, Greenland             | 7.7            |                |                          | [29] |                            |
| White Glacier, Arctic Canada              | 7.8            |                |                          | [9]  |                            |
| John Evans Glacier, Canada                | $7.9 \pm 0.4$  | $4.5 \pm 0.9$  | Arendt and Sharp, 1999   | [8]  | Mean, 2 values ice, 3 snow |
| Qamanârssûp sermia, Greenland             | 7.9            |                |                          | [29] |                            |
| Universidad Glacier, Chile                | 8              | 2.9            |                          | [30] |                            |
| Nordbogeletscher, West Greenland          | 8.1            | 2.9            | Braithwaite, 1995        | [7]  |                            |
| Qamanârssûp sermia, West Greenland        | 8.3            | 3.7            | Braithwaite, 1995        | [7]  |                            |
| Ürümqi No. 1 Glacier, Tien Shan           | 8.5            | 3.1            | Lui et al., 1996         | [1]  |                            |
| Rhonegletscher, Swiss Alps                | $8.5 \pm 0.8$  |                |                          | [19] |                            |
| Koxkar Glacier, Tianshan Mountains, China | 8.8            |                |                          | [31] | Mean value                 |
| Urumqi Glacier No. 1, Tianshan, China     | 8.9            | 2.7            |                          | [32] |                            |
| Greisgletscher, Swiss Alps                | 8.9            |                |                          | [7]  |                            |
| Storstrømmen, Northeast Greenland         | 9.3            |                |                          | [33] | Reported mean              |
| Martial Este Glacier, Argentina           | 9.4            | 4.7            |                          | [34] |                            |
| Greenland Ice Sheet                       | $9.5 \pm 3.5$  |                | Schytt, 1955             | [8]  | Mean, 2 values             |
| Kronprins Christian Land, North Greenland | 9.8            |                | Braithwaite et al., 1998 | [7]  |                            |
| Findelgletscher, Swiss Alps               | $11.4 \pm 1.8$ |                |                          | [19] |                            |
| Aletschgletscher, Swiss Alps              | 11.7           | 5.3            | Lang, 1986               | [8]  |                            |
|                                           |                |                |                          | [35] |                            |
| Langjökull, Iceland                       | 11.9           | 10.1           |                          |      | Mean, 5 values ice, snow   |
| Greenland Ice Sheet (margin)              | $12.6 \pm 6.4$ |                | Van der Wal, 1992        | [8]  | Mean, 3 values             |
| Spitsbergen                               | 13.8           |                | Schytt, 1964             | [7]  |                            |
|                                           |                |                |                          | [24] |                            |
| Vestri Hagafellsjökull, Iceland           | $14 \pm 1.8$   | $11.8 \pm 1.0$ |                          |      | Mean, 4 values             |
| Kongsvegen Glacier, Spitzbergen           | $14.1 \pm 2.8$ | $11.2 \pm 2.2$ |                          | [36] |                            |
| Greenland                                 | 15             | 3              |                          | [37] |                            |
| Brúarjökull, Iceland                      | 15.1           |                |                          | [38] | Mean, 2 values ice         |
| Greenland Ice Sheet                       | 18.6           |                | Ambach, 1963             | [7]  |                            |
| <b>Snow only</b>                          |                |                |                          |      |                            |
| Australian Alps                           |                | 2.9            |                          | [39] |                            |
| Fillefjell, Norway                        |                | 3.9            | Furmyr and Tollan, 1975  | [4]  |                            |
| Saint Sorlin Glacier, French Alps         |                | 4              |                          | [40] |                            |
| Columbia Glacier, Alaska                  |                | 4.1            |                          | [41] |                            |
| 66 glaciers                               |                | $4.1 \pm 1.4$  |                          | [42] | Mean, high, low estimates  |
| Andrews Glacier, United States            |                | 4.3            |                          | [43] |                            |

|                            |                                 |                                 |     |
|----------------------------|---------------------------------|---------------------------------|-----|
| Weissfluhjoch, Swiss Alps  | 4.5                             | De Quervain, 1979               | [7] |
| Weissfluhjoch, Swiss Alps  | 4.5                             | Zingg, 1951                     | [7] |
| Dokriani Glacier, Himalaya | 5.9                             | Singh and Kumar, 2000           | [8] |
| <b>Mean</b>                | <b><math>7.3 \pm 2.7</math></b> | <b><math>4.3 \pm 1.8</math></b> |     |
| <b>Median</b>              | <b>6.7</b>                      | <b>4</b>                        |     |
| <b>Interquartile range</b> | <b>5.6–7.9</b>                  | <b>3.2–4.6</b>                  |     |

Table S1 shows that a large variation exists for the value of melt factors ( $m_f$ ), ranging from 3.4 to 18.6 mm °C<sup>-1</sup> d<sup>-1</sup> for ice and 2.3 to 11.3 mm °C<sup>-1</sup> d<sup>-1</sup> for snow (most published studies report values in these units). These variations reflect for example, the influence and interrelationships among local topographic setting, the relative importance of components of the energy balance (e.g. radiation, sensible heat transfer, turbulence), and the nature of the melting surface (e.g. albedo, roughness). Additionally, difference exist in the length of observations (thus temporal variation), source(s) of temperature data (on or off glacier, distance to meteorological station), calculation of mean daily temperature, determination of lapse rates, whether snow/rain events during the ablation season were accounted for, and so forth [8,44,45]. Nevertheless, the mean values are  $7.3 \pm 2.7$  mm °C<sup>-1</sup> d<sup>-1</sup> for ice (n = 92) and  $4.3 \pm 1.8$  mm °C<sup>-1</sup> d<sup>-1</sup> for snow (n = 61).

The distributions of values (Fig. S1a and b) reveals their skewed nature owing to outliers that unduly influence the respective means and standard deviations. With the exception of a few, the outliers for both ice and snow are almost exclusively associated measurements on Icelandic or Spitzbergen ice caps or outlet glaciers, and on the Greenland Ice Sheet. In some instances, this might suggest the reduced role of local topography in limiting incoming solar radiation and/or other peculiarities of local energy balances [45]. (More modest values have also, however, been determined in these locations.) Given their skewness – especially that for  $m_f$  for ice, the appropriate descriptive statistics are the median and interquartile range (as a measure of dispersion). Accordingly for ice, the median  $m_f$  is 6.7 mm °C<sup>-1</sup> d<sup>-1</sup> with an interquartile range of 5.6 to 7.9 mm °C<sup>-1</sup> d<sup>-1</sup>. For snow, the median  $m_f$  is 4.0 mm °C<sup>-1</sup> d<sup>-1</sup> with an interquartile range of 3.2 to 4.6 mm °C<sup>-1</sup> d<sup>-1</sup>.

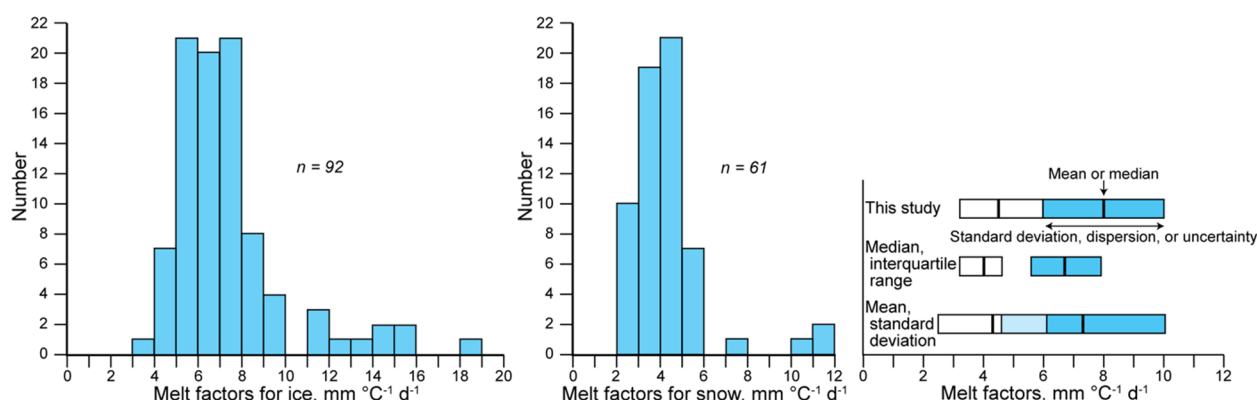

**Figure S1.** Distribution of published values of melt factor for (a) ice and (b) snow. (c) Statistical characteristics of distributions compared with assumed values used in the temperature-index model.

Our use of  $8.0 \pm 2.0$  mm °C<sup>-1</sup> d<sup>-1</sup> for ice and  $4.5 \pm 2$  mm °C<sup>-1</sup> d<sup>-1</sup> for snow in the modeling is thus guided by the foregoing, but *importantly* to also facilitate direct comparison with previous studies using the same melt factors in temperature index approaches to inferring temperature depression during the Last Glacial Maximum in Colorado [46–49]. Ultimately our assigned uncertainties in both melt factors ( $\pm 2.0$  mm °C<sup>-1</sup> d<sup>-1</sup>) provide envelopes encompassing reasonable ranges in values (Fig S1c). Moreover, our means and standard deviations compare favorably with previous compilations [7,8,47,50], and those *assumed* in other modeling studies wherein glacier mass balance is required on various spatial scales (global to regional to individual catchments) and/or to understand present, past, and future behavior [e.g. 22, 51–55].

## References

- Braithwaite, R.J., Zhang, Y. Sensitivity of mass balance of five Swiss glaciers to temperature changes assessed by tuning a degree-day model. *J. Glaciol.* **2000**, *46*, 7–14.
- Shea, J.M., Moore, R.D., Stahl, K. Derivation of melt factors from glacier mass balance records in western Canada. *J. Glaciol.* **2009**, *55*, 123–130.
- McNeil, C., O’Neel, S., Loso, M., Pelto, M., Sass, L., Baker, E.H., Campbell, S. Explaining mass balance and retreat dichotomies at Taku and Lemon Creek Glaciers, Alaska. *J. Glaciol.* **2020**, *66*, 530–542.
- Jóhannesson, T. The response of two Icelandic glaciers to climatic warming computed with a degree-day glacier mass-balance model coupled to a dynamic glacier model. *J. Glaciol.* **1997**, *43*, 321–327.
- Réveillet, M.; Vincent, C.; Six, D.; Rabatel, A. Which empirical model is best suited to simulate glacier mass balances? *J. Glaciol.* **2017**, *63*, 39–54.
- Engelhardt, M., Schuler, T.V., Andreassen, L.M. Evaluation of gridded precipitation for Norway using glacier mass-balance measurements. *Geograf. Ann.* **2012**, *94A*, 501–509.
- Braithwaite, R.J., Zhang, Y. Sensitivity of mass balance of five Swiss glaciers to temperature changes assessed by tuning a degree-day model. *J. Glaciol.* **2000**, *46*, 7–14.
- Hock, R. Temperature index melt modelling in mountain areas. *J. Hydro.* **2003**, *282*, 104–115.
- Braithwaite, R.J. On energy balance, ablation, and air temperature. *J. Glaciol.* **1981**, *27*, 381–391.
- Kienholz, C., Pierce, J., Hood, E., Amundson, J.M., Wolken, G.J., Jacobs, A., Hart, S., Jones, K.W., Abdel-Fattah, D., Johnson, C., Conaway, J.S. Deglaciation of a marginal basin and implications for outburst floods, Mendenhall Glacier, Alaska. *Front. Earth Sci.* **2020**, *8*:137.
- Six, D., Vincent, C. Sensitivity of mass balance and equilibrium-line altitude to climate change in the French Alps. *J. Glaciol.* **2014**, *60*, 867–878.
- Vincent, C.; Six, D. Relative contribution of solar radiation and temperature in enhanced temperature-index melt models from a case study at Glacier de Saint-Sorlin, France. *Ann. Glaciol.* **2013**, *54*, 11–17.
- Tangborn, W.V. A mass balance model that uses low-altitude meteorological observations and the area-altitude distribution of a glacier. *Geograf. Ann.* **1999**, *81A*, 753–766.
- Zhang, Y., Wang, X., Jiang, Z., Wei, J., Enomoto, H., Ohata, T. Glacier surface mass balance in the Suntar-Khayata Mountains, northeastern Siberia. *Water* **2019**, *11*, 1949.
- Six, D., Wagnon, P., Sicart, J.E., Vincent, C. Meteorological controls on snow and ice ablation for two contrasting months on Glacier de Saint-Sorlin, France. *Ann. Glaciol.* **2009**, *50*, 66–72.
- Gabbi, J.; Carenzo, M.; Pellicciotto, F.; Bauder, A.; Funk, M. A comparison of empirical and physically based glacier surface melt models for long-term simulation of glacier response. *J. Glaciol.* **2014**, *60*, 1140–1154.
- Kayastha, R.B., Takeuchi, Y., Nakawo, M., Ageta, Y. 2000. Practical prediction of ice melting beneath various thickness of debris cover on Khumbi Glacier, Nepal, using a positive degree-day factor. In Debris-covered glaciers; Nakawo, M., Raymond, C.F., Fountain, A., Eds. IAHA Pub. 264, **2000**, pp.71–81.
- Refsnider, K.A., Brugger, K.A. Determination of degree-day factors and mass balance simulation on Rabots Glaciär, Swedish Lapland. *Geol. Soc. Am. Abst. with Program.* **2001**, *33*, A13.
- Landmann, J.M., Künsch, H.R., Huss, M., Ogier, C., Kalisch, M., Farinotti, D. Assimilating near real-time mass balance observations into a model ensemble using a particle filter. *Cryosphere Discuss.* **2020**, 1–34.
- Konya, K., Matsumoto, T., Naruse, R. Surface heat balance and spatially distributed ablation modelling at Koryto Glacier, Kamchatka Peninsula, Russia. *Geograf. Ann.* **2004**, *86A*, 337–348.
- Stuefer, M., Rott, H., Skvarca, P. Glacier Perito Moreno, Patagonia: climatic sensitivities and glacier characteristics preceding the 2003/04 and 2005/06 damming events. *J. Glaciol.* **2007**, *53*, 3–16.
- Thibert, E., Eckert, N., Vincent, C. Climatic drivers of seasonal glacier mass balances: an analysis of six decades at Glacier de Sarnen (French Alps). *Cryosphere*, **2013**, *7*, 47–66.
- Naruse, R., Skvarca, P., Takeuchi, Y. Thinning and retreat of Glacier Upsala, and an estimate of annual ablation changes in southern Patagonia. *Ann. Glaciol.* **1997**, *24*, 38–42.
- Matthews, T., Hodgkins, R., Wilby, R.L., Gudmundsson, S., Pálsson, F., Björnsson, H., Carr, S. Conditioning temperature-index model parameters on synoptic weather types for glacier melt simulations. *Hydrol. Process.* **2015**, *29*, 1027–1045.
- Anderson, B., Lawson, W., Owens, I., Goodsell, B. Past and future mass balance of ‘Ka Roimata o Hine Hukatere’ Franz Josef Glacier, New Zealand. *J. Glaciol.* **2006**, *52*, 597–607.
- Adalgeirsdóttir, G., Jóhannesson, T., Björnsson, H., Pálsson, F., Sigurdsson, O. Response of Hofsjökull and southern Vatnajökull, Iceland, to climate change. *J. Geophys. Res. Earth Surf.* **2006**, *111*, F3.
- Pytte, R., Liestøl, O. Glasio-hydrologiske undersøkelser i Norge 1965. NVE årsrapport fra Brekontoret. **1966**.
- Schneider, C., Kilian, R., Glaser, M. Energy balance in the ablation zone during the summer season at the Gran Campo Nevado Ice Cap in the southern Andes. *Glob. Planet. Change* **2007**, *59*, 175–188.
- Braithwaite, R.J., Olesen, O.B. Detection of climate signal by inter-stake correlations of annual ablation data Qamanârssûp Sermia, west Greenland. *J. Glaciol.* **1989**, *35*, 253–259.
- Bravo, C., Loriaux, T., Rivera, A., Brock, B.W. Assessing glacier melt contribution to streamflow at Universidad Glacier, central Andes of Chile. *Hydrol. Earth Syst. Sci.* **2017**, *21*, 3249–3266.
- Xu, M., Han, H., Kang, S. The temporal and spatial variation of positive degree-day factors on the Koxkar Glacier over the south slope of the Tianshan Mountains, China, from 2005 to 2010. *Sci. Cold Arid Reg.* **2018**, *9*, 425–431.
- Wu, L., Li, H., Wang, L. Application of a degree-day model for determination of mass balance of Urumqi Glacier No. 1, eastern Tianshan, China. *J. Earth Sci.* **2011**, *22*, 470–481.
- Bøggild, C.E., Reeh, N., Oerter, H. Modelling ablation and mass balance sensitivity to climate change of Storstrømmen, northeast Greenland. *Glob. Planet. Change* **1994**, *9*, 79–90.
- Buttstädt, M., Möller, M., Iturraspe, R., Schneider, C. Mass balance evolution of Martial Este Glacier, Tierra del Fuego (Argentina) for the period 1960–2009. *Adv. Geosci.* **2009**, 117–124.
- Gudmundsson, S., Björnsson, H., Pálsson, F., Haraldsson, H. Comparison of energy balance and degree-day models of summer ablation on the Langsjökull ice cap, SW-Iceland. *Jökull* **2009**, *59*, 1–18.
- Möller, M., Kohler, J. Different climatic mass balance evolution across Svalbard glacier regions over 1900–2010. *Front. Earth Sci.* **2018**, *6*:128.

37. Fausto, R.S.; Ahlstrøm, A.P.; van As, D.; Bøggild, C.E.; Johnsen, S. A new present-day temperature parameterization for Greenland. *J. Glaciol.* **2009**, *55*, 95–105.
38. Gudmundsson, S.; Björnsson, H.; Pálsson, F.; Haraldsson, H. Comparison of physical and regression models of summer ablation on ice caps in Iceland. Science Institute, University of Iceland, National Power Company of Iceland RH-15-2003 **2003**, pp.31.
39. Whetton, P. H.; Haylock, M. R.; Galloway, R. Climate change and snow-cover duration in the Australian Alps. *Clim. Change* **1996**, *32*, 447–479.
40. Vincent, C. Influence of climate change over the 20<sup>th</sup> Century on four French glaciers mass balances. *J. Geophys. Res.* **2002**, *107*, 4375.
41. Rasmussen, L.A.; Conway, H.; Krimmel, R.M.; Hock, R. Surface mass balance, thinning and iceberg production, Columbia Glacier, Alaska, 1948–2007. *J. Glaciol.* **2011**, *57*, 431–440.
42. Braithwaite, R.J. Temperature and precipitation climate at the equilibrium-line altitude of glaciers expressed by the degree-day factor. *J. Glaciol.* **2009**, *54*, 437–444.
43. Outcalt, S.I.; McPhail, D.S. A survey of neoglaciation in the Front Range of Colorado. University of Colorado Studies Series in Earth Science **1965**, *4*, pp. 124.
44. Ohmura, A. Physical basis for the temperature-based melt index method. *J. Appl Meteorol.* **2001**, *40*, 753–761.
45. Hock, R. Glacier melt: a review of processes and their modelling. *Prog. Phys. Geogr.* **2005**, *29*, 362–391.
46. Brugger, K.A. Late Pleistocene climate inferred from the Taylor River glacier complex, southern Sawatch Range, Colorado. *Geomorph.* **2006**, *75*, 318–329.
47. Brugger, K.A. Climate in the southern Sawatch Range and Elk Mountains, Colorado, USA, during the Last Glacial Maximum: Inferences using a simple degree-day model. *Arct. Antarct. Alp. Res.* **2010**, *42*, 164–178.
48. Brugger, K.A.; Laabs, B.; Reimers, A.; Bensen, N. Late Pleistocene glaciation in the Mosquito Range, Colorado, USA: Chronology and climate. *J. Quat. Sci.* **2019**, *34*, 187–202.
49. Brugger, K.A.; Ruleman, C.A.; Caffee, M.W.; Mason, C.C. Climate during the Last Glacial Maximum in the Northern Sawatch Range, Colorado, USA. *Quat.* **2019**, *2*, 22 pp.
50. Anderson, L.S.; Roe, G.H.; Anderson, R.S. The effects of interannual climate variability on the moraine record. *Geology* **2014**, *42*, 55–58.
51. Huss, M.; Hock, R. A new model for global glacier change and sea-level rise. *Front. Earth Sci.* **2015**, *3*, 54.
52. Braithwaite, R.J.; Raper, S.C.B. Glaciological conditions in seven contrasting regions estimated with a degree-day model. *Ann. Glaciol.* **2007**, *46*, 297–302.
53. Zekollari, H.; Huss, M.; Farinotti, D. Modelling the future evolution of glaciers in the European Alps under the EURO-CORDEX RCM ensemble. *Cryosphere* **2019**, *13*, 1125–1146.
54. Heyman, B.M.; Heyman, J.; Fickert, T.; Harbor, J.M. Paleo-climate of the central European uplands during the last glacial maximum based on glacier mass-balance modeling. *Quat. Res.* **2013**, *79*, 49–54.
55. Allen, R.; Siegert, M.J.; Payne, A.J. Reconstructing glacier-based climates of LGM Europe and Russia-Part 1: Numerical modelling and validation methods. *Clim. Past* **2007**, *4*, 235–248.
