# Supplementary material for: Climate on the Blanca Massif, Sangre de Cristo Mountains, Colorado, USA, during the Last Glacial Maximum
Source: MDPI journal article supplement (doi:10.3390/quat4030027), 2021-08-30
Supplement: s1 [file s1]

Archive with 1 entries (1 files):
- quaternary-1274719-supplementary.pdf
